# Supplementary material for: BCL6 deletion in CD4 T cells does not affect Th2 effector mediated immunity in the skin
Source: PubMed Central journal article supplement — Immunol Cell Biol. 2022 Oct 18;100(10):791–804. doi: 10.1111/imcb.12589 (PMC9828354; doi:10.1111/imcb.12589), 2022-10-18
Supplement: IMCB-100-791-s001.pdf [file IMCB-100-791-s001.pdf]

## SUPPLEMENTARY FILES

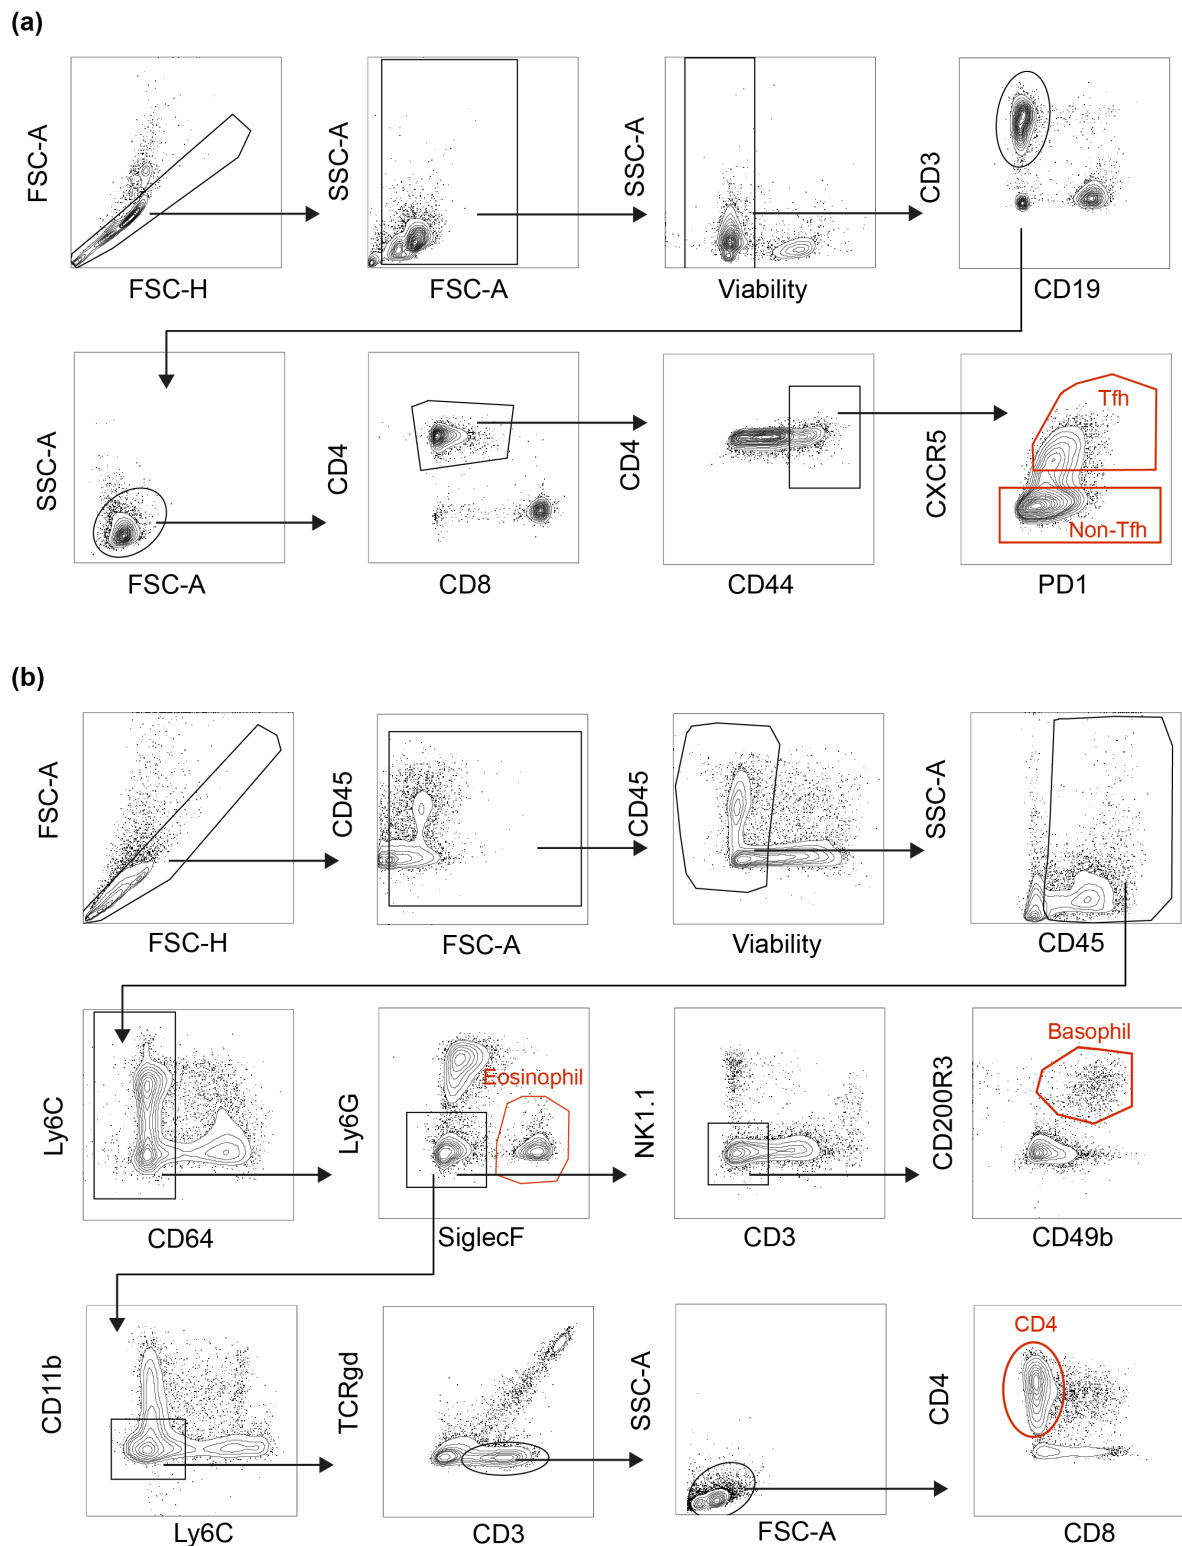

**Supplementary figure 1. Gating strategies for dLN and tissue**

**(a)** Gating strategy for non-Tfh and Tfh cells in the aLN/medLN. **(b)** Gating strategy for CD4 T cells, eosinophils and basophils in the skin/lung tissue.

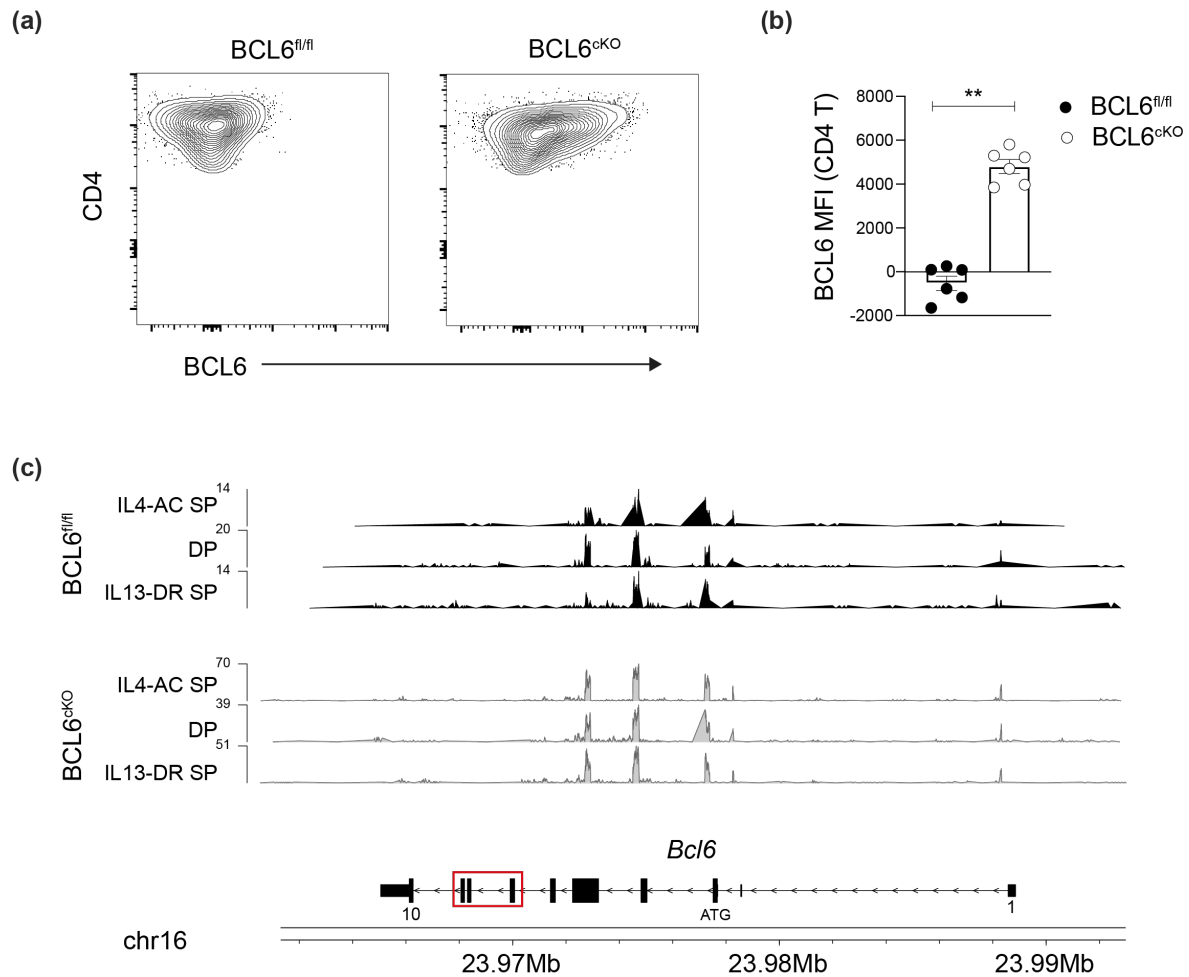

**Supplementary figure 2. Truncated *Bcl6* transcription is enhanced in BCL6 deficient CD4 T cells and can accurately fold into a detectable but non-functional BCL6 protein**

$BCL6^{fl/fl}.4C13R$  and  $BCL6^{cKO}.4C13R$  mice were sensitised with 200 $\mu$ g HDM in the ear pinna. Tissues were collected for analysis on day seven. MFI of BCL6 was quantified by flow cytometry and depicted as flow plots (a) and bar graphs (b). Black circles represent  $BCL6^{fl/fl}$ , white circles represent  $BCL6^{cKO}$  samples. Data are shown as means  $\pm$  SEM for six ears/group. \* $P < 0.05$ , \*\* $P < 0.01$ , \*\*\* $P < 0.001$ . P-values were determined using a Mann Whitney test. (c) Karyoplot<sup>45</sup> visualisation of Illumina RNA-seq reads aligned to *Bcl6* (chromosome 16) mouse mm10. One representative replicate is shown from each Th2eff cell type (IL4-AC SP, IL4-AC.IL13-DR DP, IL13-DR SP) from each mouse strain ( $BCL6^{fl/fl}.4C13R$  or  $BCL6^{cKO}.4C13R$ ). Linearly scaled peaks indicate the number of reads that were aligned to the *Bcl6* region, and the maximum peak for each sample is noted. *Bcl6* exons (1-10) are denoted by black rectangles, non-coding exons are half the height of coding exons. Exons 7-9 are highlighted in a red box as these are conditionally knocked out in  $BCL6^{cKO}.4C13R$  mice.

**Supplementary table 1. IL4-AC SP: BCL6<sup>fl/fl</sup> vs BCL6<sup>ckO</sup> DEGs**

|                      | Bcl6 <sup>ckO</sup> mean VSTpk | Bcl6 <sup>fl/fl</sup> mean VSTpk | log <sub>2</sub> .FC | adj.P.val  |
|----------------------|--------------------------------|----------------------------------|----------------------|------------|
| <i>Ikzf2</i>         | 4.538594148                    | 6.429188181                      | 2.02837597           | 6.65E-08   |
| <i>Cxcr3</i>         | 5.490793629                    | 7.058148914                      | 1.74112149           | 3.40E-09   |
| <i>Hmox1</i>         | 4.961308735                    | 6.227166254                      | 1.6713963            | 0.00607236 |
| <i>Sdcbp2</i>        | 4.989556617                    | 6.119169149                      | 1.57972118           | 3.35E-06   |
| <i>Gpm6b</i>         | 5.293469332                    | 6.635412918                      | 1.41561988           | 3.35E-06   |
| <i>Lta</i>           | 4.548031364                    | 5.45002811                       | 1.4061896            | 4.64E-04   |
| <i>Osbp13</i>        | 3.667394685                    | 4.565043762                      | 1.35228866           | 3.23E-04   |
| <i>Rora</i>          | 4.225265069                    | 5.401087542                      | 1.29635865           | 3.23E-07   |
| <i>Ikzf3</i>         | 6.241749892                    | 7.553969427                      | 1.28862553           | 4.27E-04   |
| <i>Syt11</i>         | 5.458888159                    | 6.654420903                      | 1.27279106           | 2.15E-14   |
| <i>Plcx2</i>         | 3.491879799                    | 4.327243135                      | 1.25669576           | 9.52E-04   |
| <i>March6</i>        | 4.422272962                    | 5.368245868                      | 1.17783372           | 1.14E-04   |
| <i>Cpd</i>           | 4.172311453                    | 5.137882306                      | 1.17578019           | 2.69E-04   |
| <i>Map6</i>          | 4.481229675                    | 5.386082045                      | 1.13253104           | 7.20E-05   |
| <i>Odc1</i>          | 6.070586707                    | 7.095902179                      | 1.0818816            | 1.05E-05   |
| <i>Slamf1</i>        | 4.593133059                    | 5.401831712                      | 1.06725909           | 0.00812322 |
| <i>Arnt2</i>         | 4.199867369                    | 4.933422875                      | 1.00693877           | 0.00962322 |
| <i>Pde3b</i>         | 4.78980172                     | 5.660019321                      | 1.00183577           | 0.00554782 |
| <i>Ldhd</i>          | 4.463887073                    | 3.289169576                      | -2.1337158           | 2.37E-04   |
| <i>Bcl6</i>          | 5.755743654                    | 4.277222217                      | -1.8910635           | 4.19E-12   |
| <i>Cd7</i>           | 9.655539791                    | 7.834497382                      | -1.7937667           | 1.00E-16   |
| <i>I500009L16Rik</i> | 6.605276089                    | 5.073285303                      | -1.7891626           | 4.54E-13   |
| <i>Cdh1</i>          | 5.728518611                    | 4.269282921                      | -1.7123668           | 0.00405351 |
| <i>Pdlim4</i>        | 6.403071504                    | 5.149834715                      | -1.598035            | 1.17E-08   |
| <i>Itgb7</i>         | 9.985879075                    | 8.406530946                      | -1.5703048           | 0.00432046 |
| <i>Gzmb</i>          | 11.91541261                    | 10.40222466                      | -1.5420258           | 1.43E-15   |
| <i>Lgals7</i>        | 7.922205599                    | 6.566934945                      | -1.4231933           | 1.97E-15   |
| <i>Cnr2</i>          | 5.099260012                    | 4.119742661                      | -1.3747554           | 0.00765384 |
| <i>Prag1</i>         | 5.479321786                    | 4.417393999                      | -1.3706185           | 5.12E-04   |
| <i>Ssbp4</i>         | 5.990665955                    | 5.022648019                      | -1.2441665           | 0.00655666 |
| <i>Spef2</i>         | 5.01470046                     | 4.072168682                      | -1.2183634           | 2.95E-04   |
| <i>Adgrg3</i>        | 6.39815747                     | 5.310969446                      | -1.2139461           | 8.88E-06   |
| <i>Nfil3</i>         | 7.433056729                    | 6.286228774                      | -1.2124561           | 5.41E-04   |
| <i>Trem12</i>        | 4.831499009                    | 4.028349031                      | -1.1125861           | 0.00174207 |
| <i>Il13</i>          | 5.591928856                    | 4.85588377                       | -1.0851218           | 0.00373676 |
| <i>Fbxo17</i>        | 6.155516271                    | 5.269330283                      | -1.0827504           | 0.00405351 |
| <i>Tmem30a</i>       | 8.094755516                    | 7.00716848                       | -1.0738293           | 0.00588076 |
| <i>Bmp7</i>          | 6.518227459                    | 5.508836728                      | -1.0692953           | 2.95E-04   |
| <i>Neb</i>           | 6.688701703                    | 5.619748782                      | -1.0412144           | 4.54E-11   |
| <i>Klhl9</i>         | 6.36244065                     | 5.401727746                      | -1.0367274           | 3.80E-05   |
| <i>Tmem64</i>        | 7.931654736                    | 6.903254796                      | -1.0179979           | 1.65E-04   |

**Supplementary table 2. IL4-AC.IL13-DR DP: BCL6<sup>fl/fl</sup> vs BCL6<sup>ckO</sup> DEGs**

|                      | Bcl6 <sup>ckO</sup> mean VSTpk | Bcl6 <sup>fl/fl</sup> mean VSTpk | log <sub>2</sub> .FC | adj.P.val  |
|----------------------|--------------------------------|----------------------------------|----------------------|------------|
| <i>Plcx2</i>         | 3.176390131                    | 4.114314478                      | 1.5440217            | 1.63E-04   |
| <i>Cxcr3</i>         | 5.351239144                    | 6.499314631                      | 1.37675689           | 4.18E-05   |
| <i>9430015G10Rik</i> | 4.429777095                    | 5.368981207                      | 1.31890268           | 4.60E-04   |
| <i>Zfp408</i>        | 3.965389436                    | 4.799708008                      | 1.24829662           | 0.00500805 |
| <i>Nek8</i>          | 4.484673689                    | 5.382169138                      | 1.21366171           | 0.00159408 |
| <i>Tmem131l</i>      | 3.520339078                    | 4.234123267                      | 1.20670407           | 0.00394954 |
| <i>Map6</i>          | 4.573268286                    | 5.568272078                      | 1.17850731           | 3.31E-05   |
| <i>Syt11</i>         | 5.599574014                    | 6.711886734                      | 1.15287907           | 2.87E-11   |
| <i>Slc37a2</i>       | 4.388683721                    | 5.248346467                      | 1.08165252           | 0.00637263 |
| <i>B3galt4</i>       | 4.685973                       | 5.409974673                      | 1.04005512           | 0.0052219  |
| <i>Ltb</i>           | 7.476682199                    | 8.554013046                      | 1.0368087            | 4.02E-10   |
| <i>Pecam1</i>        | 4.92645538                     | 5.663746325                      | 1.02419123           | 0.00663904 |
| <i>Cd209e</i>        | 4.877146481                    | 4.18843513                       | -3.8869496           | 0.00419504 |
| <i>Il3</i>           | 3.570851111                    | 2.775920944                      | -2.8435634           | 1.57E-06   |
| <i>Bcl6</i>          | 4.617077623                    | 3.803141993                      | -2.2188647           | 1.82E-15   |
| <i>Rbm47</i>         | 5.093070585                    | 4.373012677                      | -1.8453675           | 3.39E-04   |
| <i>Klrc2</i>         | 5.660874599                    | 4.895977024                      | -1.7884738           | 0.00120263 |
| <i>Ccl1</i>          | 11.60933846                    | 10.55068026                      | -1.7027752           | 0.00433502 |
| <i>Yipf4</i>         | 3.906588294                    | 3.120043598                      | -1.5232113           | 0.00735611 |
| <i>Tmem30a</i>       | 5.886239029                    | 5.00832699                       | -1.3681042           | 9.99E-05   |
| <i>Rab28</i>         | 4.971037861                    | 4.242497676                      | -1.362732            | 0.00952638 |
| <i>Klrc1</i>         | 4.709634736                    | 3.97299377                       | -1.3471154           | 2.46E-04   |
| <i>Ms4a6d</i>        | 5.535732574                    | 4.582476295                      | -1.3322279           | 0.00149124 |
| <i>Cpm</i>           | 5.05684646                     | 4.142783105                      | -1.2893106           | 1.88E-07   |
| <i>Cd7</i>           | 5.273892214                    | 4.279547965                      | -1.2461977           | 4.02E-10   |
| <i>Zfp825</i>        | 7.005175641                    | 5.912875293                      | -1.2408851           | 0.00965928 |
| <i>Klhl9</i>         | 5.341077507                    | 4.355804565                      | -1.2049444           | 1.88E-06   |
| <i>Atp2c1</i>        | 5.708554989                    | 4.690670228                      | -1.2039898           | 0.00163208 |
| <i>Zfp281</i>        | 6.312963578                    | 5.20944391                       | -1.1973264           | 1.03E-04   |
| <i>Marcks</i>        | 4.631435913                    | 3.79388342                       | -1.1868585           | 1.37E-04   |
| <i>Zfyve16</i>       | 6.076925444                    | 4.954528121                      | -1.1831642           | 1.63E-04   |
| <i>Serp1nb6b</i>     | 5.173218454                    | 4.412933002                      | -1.1515427           | 4.87E-05   |
| <i>Mgat5</i>         | 7.176194944                    | 6.040202589                      | -1.1433494           | 8.25E-05   |
| <i>Itga2</i>         | 6.657262433                    | 5.430718495                      | -1.1404695           | 0.00297297 |
| <i>Ppp3ca</i>        | 5.641478329                    | 4.696275602                      | -1.137295            | 1.63E-04   |
| <i>Bclaf3</i>        | 6.510947825                    | 5.395048232                      | -1.1295334           | 0.00504538 |
| <i>Dcun1d5</i>       | 4.939592466                    | 4.080674573                      | -1.1237072           | 0.00929168 |
| <i>Hhex</i>          | 7.910158511                    | 6.526110861                      | -1.0856778           | 7.39E-04   |
| <i>Zfp738</i>        | 5.432031289                    | 4.405763804                      | -1.0808106           | 0.00160365 |
| <i>Gzmb</i>          | 7.839046697                    | 6.089102906                      | -1.0791569           | 3.79E-07   |
| <i>Tex30</i>         | 4.860429691                    | 3.832804944                      | -1.0752647           | 3.70E-04   |
| <i>Bmp7</i>          | 4.697514339                    | 3.523656149                      | -1.0456948           | 0.00301338 |
| <i>Rreb1</i>         | 5.662253732                    | 4.035906049                      | -1.0220611           | 7.19E-04   |
| <i>D1Ert622e</i>     | 8.744998746                    | 5.965394965                      | -1.0114027           | 1.63E-04   |
| <i>Ube2q2</i>        | 5.104110584                    | 3.441929618                      | -1.0012106           | 0.0079353  |

**Supplementary table 3. IL13-DR SP: BCL6<sup>fl/fl</sup> vs BCL6<sup>CKO</sup> DEGs**

|                      | Bcl6 <sup>CKO</sup> mean VSTpk | Bcl6 <sup>fl/fl</sup> mean VSTpk | log <sub>2</sub> .FC | adj.P.val  |
|----------------------|--------------------------------|----------------------------------|----------------------|------------|
| <i>Bcl2</i>          | 3.89037404                     | 5.07382953                       | 1.53544418           | 4.51E-06   |
| <i>Tspoap1</i>       | 4.67892513                     | 6.07785049                       | 1.35605336           | 8.68E-04   |
| <i>Cdc7</i>          | 5.19327491                     | 6.19858943                       | 1.14053167           | 1.31E-04   |
| <i>Zbtb11</i>        | 4.84438071                     | 5.7238568                        | 1.01698343           | 5.64E-05   |
| <i>Cd209e</i>        | 5.37795991                     | 4.59013895                       | -4.3661429           | 0.00223076 |
| <i>Il3</i>           | 5.94047567                     | 5.11857799                       | -3.0182059           | 1.85E-07   |
| <i>Bcl6</i>          | 6.46249647                     | 5.42395019                       | -2.4707679           | 1.00E-16   |
| <i>Fcgrt</i>         | 6.97463201                     | 5.93492185                       | -1.7799645           | 0.002843   |
| <i>Cd200</i>         | 4.98745566                     | 4.12806178                       | -1.6709018           | 0.00401491 |
| <i>Bmp7</i>          | 6.34277439                     | 5.4424478                        | -1.4981876           | 5.33E-05   |
| <i>Bach2</i>         | 4.51101573                     | 3.78192488                       | -1.4841517           | 2.89E-09   |
| <i>Tyh3</i>          | 6.83852114                     | 5.6950356                        | -1.4610644           | 0.00853229 |
| <i>Zfyve16</i>       | 8.65776843                     | 7.38750915                       | -1.38215             | 6.04E-05   |
| <i>Cd7</i>           | 11.2606127                     | 9.98921815                       | -1.310766            | 1.37E-11   |
| <i>Agpat4</i>        | 9.08253648                     | 7.75166253                       | -1.3052596           | 1.85E-10   |
| <i>Il10</i>          | 6.59804099                     | 5.46617211                       | -1.2936382           | 5.95E-04   |
| <i>Gzmb</i>          | 7.32037824                     | 6.09864555                       | -1.2820867           | 2.36E-10   |
| <i>Tnfsf8</i>        | 4.71156771                     | 3.75429583                       | -1.2638753           | 8.16E-08   |
| <i>1500009L16Rik</i> | 4.39975727                     | 3.58814166                       | -1.2304816           | 5.24E-07   |
| <i>Scml4</i>         | 4.86628403                     | 3.73945819                       | -1.1990371           | 0.00230127 |
| <i>Rhoc</i>          | 4.75918295                     | 3.84127784                       | -1.1048647           | 1.85E-06   |
| <i>Il6st</i>         | 6.49931619                     | 5.09632968                       | -1.0752299           | 1.02E-04   |
| <i>Cpm</i>           | 5.15774004                     | 4.17535637                       | -1.0548435           | 2.63E-05   |
| <i>Lpp</i>           | 5.92161192                     | 4.03843238                       | -1.0335857           | 2.35E-11   |
| <i>Lgmn</i>          | 8.53018297                     | 5.76282985                       | -1.0270463           | 9.89E-05   |
| <i>Dglucy</i>        | 5.47363699                     | 3.41148665                       | -1.0162188           | 5.31E-04   |
